# Supplementary material for: Characterization of NUDIX Hydrolase from Leishmania major
Source: Research Square preprint supplement (doi:10.21203/rs.3.rs-5795708/v1), 2025-03-17
Supplement: Supplementary file 1 [file 464e488a91cf867d8c68a1e9.pdf]

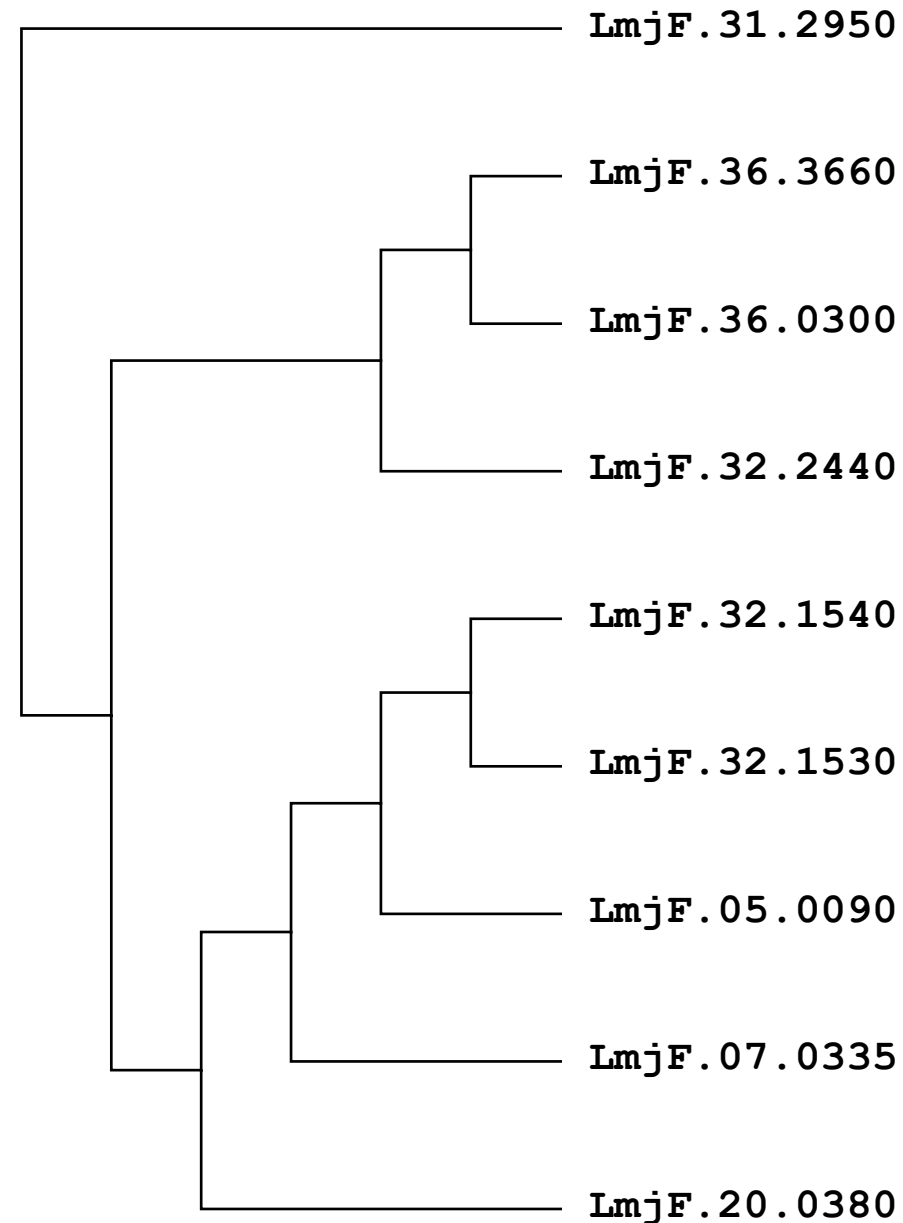

**Supplementary Figure 1:** Phyletic analysis of nine NUDIX Domain proteins from *L. major*. The amino acid sequences of different NUDIX domain proteins were aligned and a molecular evolutionary tree was constructed using 'Clustal Omega' and 'Clustal W2 Phylogeny' (<http://www.ebi.ac.uk/services>), and MEGA 6.06 (Tamura K, *et al*, 2013, MEGA6, *Mol Biol Evol*, 30:2725-2729). The phyletic tree was derived by sequences sourced from *L. major* strain Friedlin homepage (<http://www.genedb.org/Homepage/Lmajor>).
