# Supplementary material for: Characterization of NUDIX Hydrolase from Leishmania major
Source: Research Square preprint supplement (doi:10.21203/rs.3.rs-5795708/v1), 2025-03-17
Supplement: Supplementary file 2 [file d078db09c2a3773d05a2c928.pdf]

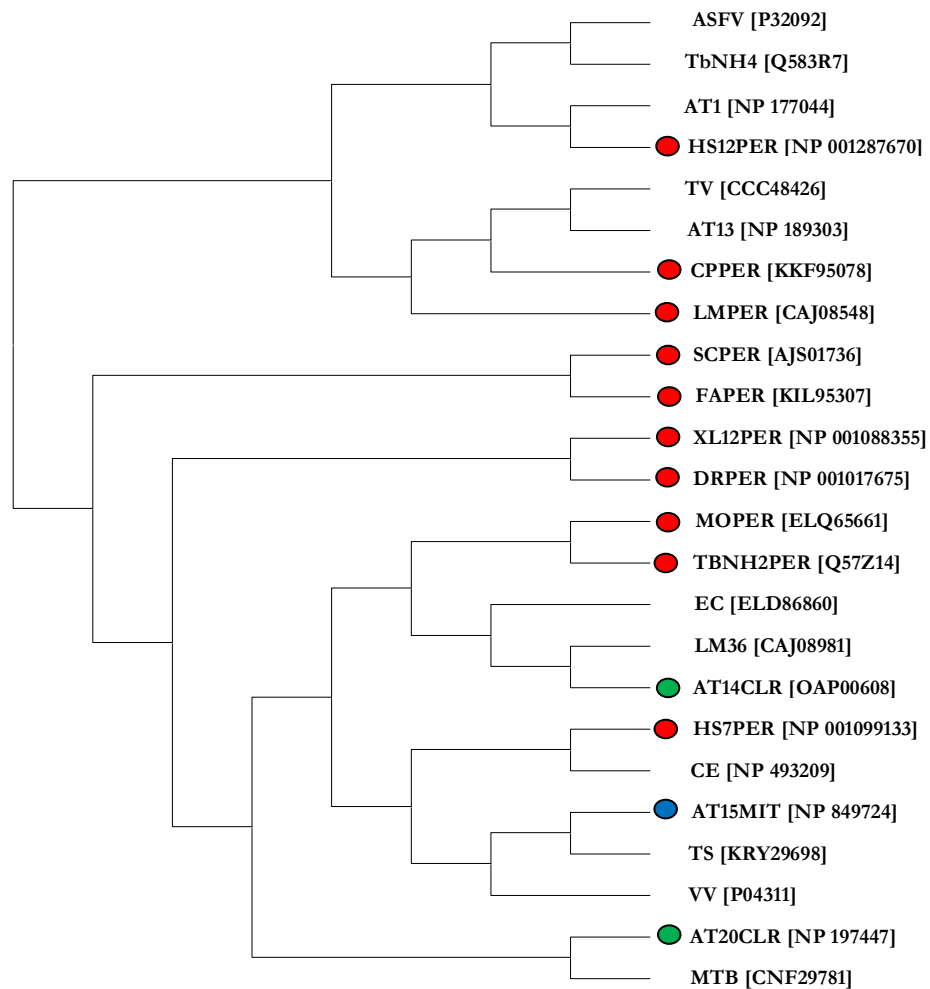

**Supplementary Figure 2: Phyletic analysis of NUDIX Domain proteins.** The amino acid sequences of different NUDIX domain proteins were aligned and a molecular evolutionary tree was constructed using ‘Clustal Omega’ and ‘Clustal W2 Phylogeny’ and MEGA 6.06. The phyletic tree was derived by using sequences which were sourced from NCBI data bank with accession numbers as shown in the parentheses for each organism. NUDIX proteins targeted to **peroxisomes** are labeled with red circle, while the **chloroplast** and **mitochondria** targeted proteins are marked with green and blue circles respectively.
